# Supplementary material
Source: publisher figshare collection journal article supplement (https://acs.figshare.com/ndownloader/files/31585202)
Supplement: Supplementary file 1 [file 31585202]

# In Vitro Assessment Reveals the Effects of Environmentally Persistent Free Radicals on the Toxicity of Photoaged Tire Wear Particles

Ze Liu <sup>a</sup>, Yajiao Sun <sup>a</sup>, Jianqun Wang <sup>b</sup>, Jiahui Li <sup>a</sup>, Hanzhong Jia <sup>a\*</sup>

<sup>a</sup> Key Laboratory of Plant Nutrition and the Agri-Environment in Northwest China, Ministry of Agriculture, College of Natural Resources and Environment, Northwest A&F University, Yangling 712100, China

<sup>b</sup> Institute of Hard Tissue Development and Regeneration, The Second Affiliated Hospital of Harbin Medical University, Harbin 150086, China

\*E-mail: [jjahz@nwafu.edu.cn](mailto:jjahz@nwafu.edu.cn)

### **Text S1. Method of thermogravimetric analysis of main constituents of TWP**

Main constituents of TWP were quantified by thermogravimetric analysis (TGA, Mettler Toledo). Different components were determined by analysis the mass loss after heating the sample: (a) volatile substances (vaporize between 30- 300 °C), (b) the actual polymer (300–600 °C), (c) carbon black (600–850 °C), and the residue<sup>1</sup>. Temperature was increased from 30 to 850 °C with a constant heating rate of 20 °C. For purge gas, nitrogen (50 ml/min) was set from 30 to 600°C: Nitrogen (50 ml min<sup>-1</sup>) and air (50 ml/min) was from 600 to 850 °C.

### **Text S2. Method of pyrolysis-GCMS analysis of chemical composition of TWP**

Pyrolysis-GC/MS analysis was performed by using a pyrolyzer (EGA/PY3030D, Frontier, Japan), a gas chromatograph (TRACE1310, Thermo Scientific, USA) and a mass spectrometer (ISQ, Thermo Scientific, USA). The sample of TWP (approximately 1.0 mg) was pyrolyzed in the single-shot mode at 750 °C for 0.2 min. The high purity (>99.9995%) helium was used as the gas carrier with a flow rate of 1.0 mL/min, and the pyrolysis products were injected with a split ratio of 100:1. The

temperatures of the interface and transfer lines were set at 320 °C. The obtained mass spectra and the NIST MS library were used to identify the pyrolysis products and the interpretation. More parameters of pyrolysis-GC/MS analysis are presented in Table S2.

### **Text S3. Method of ICP-OES analysis for metals qualitative analysis of TWP**

Analysis of trace metals of TWP was with a Thermo Scientific ICAP 7200 Inductive Coupled Plasma-Optical Emission Spectrometry (ICP-OES) analyzer. The machine was equipped with a Teledyne Cetac ASX-560 autosampler. The argon used to form the plasma was of high purity (Alphagaz, >99.9995%) and was supplied by Air Liquide (Belgium). The trace metals were detected by ICP-OES operated in axial mode and three characteristic spectral emission wavelengths were included for each element (as seen in Table S3). In order to avoid contamination from previous analysis, a 1% nitric acid solution (acidified bides) was used to rinse the autosampler tubing, nebulizer and spray chamber for 45 s automatically by the instrument. After every 10 samples, one of the standards and the calibration curve's blank was analyzed as

quality control. In addition, during measurement, all used glassware and recipients were first twice rinsed with a 10% nitric acid solution and subsequently with bidest water.

#### **Text S4. EPR analysis of EPFRs and ROS on TWP**

0.5 g photoaged TWP was taken for EPR analysis with using by EPR measurements using a Bruker EMXmicro-6/1/P/L spectrometer (Karlsruhe, Germany) at room temperature ( $\sim 25^{\circ}\text{C}$ ) and the parameters of EPR measurement were provided in Table S2. For EPFRs detection, 50 mg partials were collected and placed in an I.D. quartz tube, then, the quartz tube was directly inserted into the cavity of the EPR instrument for EPFRs analysis. For ROS analysis, DMPO solution (100 mM), DMPO/DMSO solution (100 mM) and TEMP solution (100 mM) were used as spin-trapping agents for coupling  $\cdot\text{OH}$ ,  $\text{O}_2^{\cdot-}$  and  $^1\text{O}_2$ , respectively. 50 mg particles were taken and mixed with 500  $\mu\text{L}$  DMPO solution, 500  $\mu\text{L}$  DMPO/DMSO solution and 500  $\mu\text{L}$  TEMP solution for detecting  $\cdot\text{OH}$ ,  $\text{O}_2^{\cdot-}$  and  $^1\text{O}_2$ <sup>2</sup>. Analysis of non-photoaged TWP was regarded as the control.

**Table S1. Information of manufacturers and use histories of the eight car tires used to produce tire tread wear particles**

| Nr | Brand       | Tire              | Type       | Tire code         |
|----|-------------|-------------------|------------|-------------------|
| 1  | Michelin    | Primacy 4         | All season | 235/50 R 19 99 V  |
| 2  | Dunlop      | SP SPORT 270      | Summer     | 215/60 R 16 95 V  |
| 3  | Bridgestone | Dueler H/P Sport  | All season | 215/55 R18 95V    |
| 4  | Bridgestone | Dueler H/L Alenza | Summer     | 245/50 R 19 105 V |
| 5  | Pirelli     | Cinturato P7      | Summer     | 225/50 R 17 94W   |
| 6  | Michelin    | Primacy 3ZP       | Summer     | 195/65 R15 91 V   |
| 7  | Pirelli     | Cinturato P7      | All season | 245/45 R 19 102 Y |
| 8  | Bridgestone | Turanza ER300     | Summer     | 205/55 R 16 91V   |

**Table S2. Overview of parameters of pyrolysis-GC/MS analysis for identifying organics of TWP**

| Apparatus                                        | Parameters                | Settings                                                                     |
|--------------------------------------------------|---------------------------|------------------------------------------------------------------------------|
| Pyrolyzer (Single-shot analysis)<br>EGA/PY-3030D | Pyrolysis temperature     | 750 °C                                                                       |
|                                                  | Interface temperature     | 320 °C                                                                       |
|                                                  | Pyrolysis time            | 0.2 min                                                                      |
| Gas Chromatograph<br>TRACE1310                   | Column,<br>Agilent        | 30 m, i.d. 0.25 mm, 5% diphenyl 95% polysiloxane HP-5 ms capillary column,   |
|                                                  | Injector port temperature | 320 °C                                                                       |
|                                                  | temperature program       | 50 °C (2 min) → (10 °C/min) → 280 °C (10 min) → (20 °C/min) → 320 °C (2 min) |
|                                                  | Injector mode             | Split (100:1)                                                                |
|                                                  | Carrier gas               | Helium, 1.0 mL/min, constant linear velocity                                 |
| Mass Spectrometer                                | Ion source temperature    | 300 °C                                                                       |
|                                                  | Scan range                | 35 to 500 m/z                                                                |

**Table S3. Overview of the included trace metals, the analyzed wavelengths and their detection limits. The underlined wavelength was used for quantification.**

| Trace metal | Abb. | CAS N°    | Wavelengths (nm) |         |         | LOD* (µg/L) | LOQ* (µg/L) |
|-------------|------|-----------|------------------|---------|---------|-------------|-------------|
| Aluminum    | Al   | 7429-90-5 | <u>309.271</u>   | 167.079 | 308.215 | 20          | 40          |
| Cadmium     | Cd   | 7440-43-9 | <u>214.438</u>   | 228.802 | 226.502 | 1.0         | 1.2         |
| Chromium    | Cr   | 7440-47-3 | <u>267.716</u>   | 283.563 | 284.325 | 1.5         | 5.1         |
| Copper      | Cu   | 7440-50-8 | <u>324.754</u>   | 327.396 | 224.700 | 1.0         | 2.5         |
| Iron        | Fe   | 7439-89-6 | <u>259.940</u>   | 238.204 | 239.562 | 1.1         | 3.5         |
| Manganese   | Mn   | 7439-96-5 | <u>257.610</u>   | 259.373 | 260.569 | 1.0         | 1.9         |
| Nickel      | Ni   | 7440-02-0 | <u>231.604</u>   | 221.647 | 341.476 | 1.0         | 2.4         |
| Lead        | Pb   | 7439-92-1 | <u>220.353</u>   | 216.999 | 261.418 | 3.0         | 10          |
| Strontium   | Sr   | 7440-24-6 | <u>407.771</u>   | 421.552 | 346.446 | 1.0         | 1.2         |
| Zinc        | Zn   | 7440-66-6 | <u>202.548</u>   | 213.856 | 206.200 | 1.0         | 1.4         |

\*LOD and LQD are the limit of detection (LOD) and the limit of quantification (LOQ), respectively. The detection limits were estimated based on the standard deviation of six repeated measurements of the lowest measurable standard.

\* The underlined wavelength was used for quantification.

**Table S4. List of concentrations of main heavy metals detected in the particles of prepared TWP (mg/kg). Standard deviation analysis is based on triplicate tests.**

| Sample    | Cd      | Co      | Cr       | Cu*      | Mn      | Ni       | Pb       | Fe       | Zn       |
|-----------|---------|---------|----------|----------|---------|----------|----------|----------|----------|
| Particles | 1.5±0.3 | 0.6±0.1 | 23.9±6.6 | 34.9±5.4 | 6.6±1.1 | 20.5±4.1 | 14.4±5.1 | 12.6±3.7 | 75.3±7.1 |

**Table S5. Parameters of EPR analysis for identifying EPFRs and ROS on particles of TWP \*.**

| Parameters           | EPFRs identification | ROS identification |
|----------------------|----------------------|--------------------|
| Microwave frequency  | 9.8 GHz (X-band)     | 9.8 GHz (X-band)   |
| Center field         | 3504.3 G             | 3500 G             |
| Microwave power      | 0.5024 mW            | 2.0 mW             |
| Modulation frequency | 1.0 G                | 1.0 G              |
| Sweep width          | 80 G                 | 100 G              |
| Time constant        | 0.01 ms              | 15.0 ms            |
| Sweep time           | 30.0 s               | 10 s               |
| Scanning times       | 5                    | 20                 |

\* SpinFit (Bruker's Xenon program) was used to simulate solution spectra, since this software provided an automatic fit to the experimental spectrum and determined the relative intensity of each spin adducts.

**Table S6. Description of primers used in the PCRs**

| Gene             | primers                 |
|------------------|-------------------------|
| IL6-F            | CTGCAAGAGACTTCCATCCAG   |
| IL6-R            | AGTGGTATAGACAGGTCTGTTGG |
| TNF- $\alpha$ -F | CAGGCGGTGCCTATGTCTC     |
| TNF- $\alpha$ -R | CGATCACCCCGAAGTTCAGTAG  |
| iNOS-F           | GTTCTCAGCCCAACAATACAAGA |
| iNOS-R           | GTGGACGGGTCGATGTCAC     |

**Table S7. EPR spectral characteristics of EPFRs detected on TWP under light irradiation for different days.**

| light irradiation time (d) | g-factors | line width ( $\Delta H_{p-p}$ , Gauss) |
|----------------------------|-----------|----------------------------------------|
| 0                          | 2.00308   | 5.93                                   |
| 5                          | 2.00308   | 5.85                                   |
| 10                         | 2.0031    | 5.71                                   |
| 15                         | 2.0031    | 5.94                                   |
| 20                         | 2.00312   | 5.94                                   |
| 25                         | 2.00313   | 5.91                                   |
| 30                         | 2.00311   | 6.03                                   |
| 40                         | 2.00311   | 6.02                                   |
| 50                         | 2.00308   | 5.95                                   |
| 60                         | 2.00309   | 5.95                                   |

**Table S8. EPFRs concentrations for radical quenching experiments by EPR analysis.**

| TWP<br>samples            | Spin density on ( $10^{17}$ spins/g) |                                 |                                     | Decay efficiency of EFPRs<br>concentrations for radicals<br>quenching tests by water |
|---------------------------|--------------------------------------|---------------------------------|-------------------------------------|--------------------------------------------------------------------------------------|
|                           | Before                               | After                           | Concentrations of<br>reactive EPFRs |                                                                                      |
|                           | treated by                           | treated by                      |                                     |                                                                                      |
|                           | O <sub>2</sub> -purged<br>water      | O <sub>2</sub> -purged<br>water |                                     |                                                                                      |
| Without<br>irradiation    | 3.04                                 | 2.87                            | 0.17                                | 5.5%                                                                                 |
| With 60 d-<br>irradiation | 3.97                                 | 2.82                            | 1.15                                | 29.0%                                                                                |



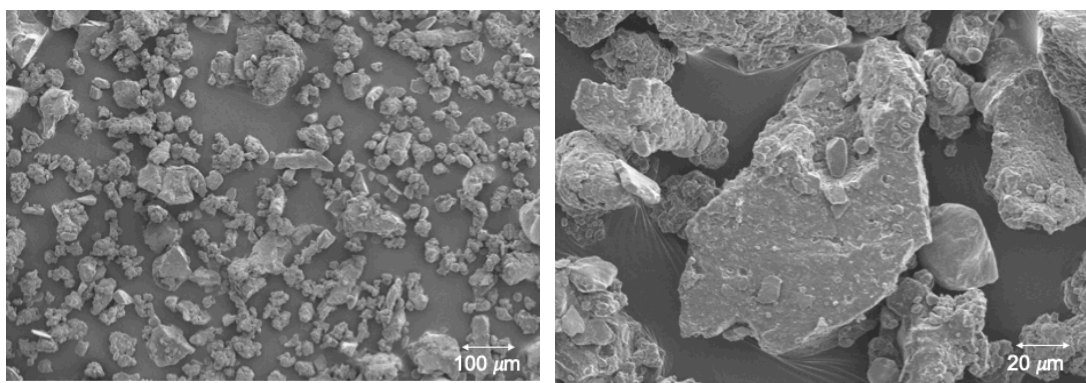

**Figure S1. Scanning electron microscope pictures of particles of prepared TWP at magnification of 300× (left) and 2000× (right).**

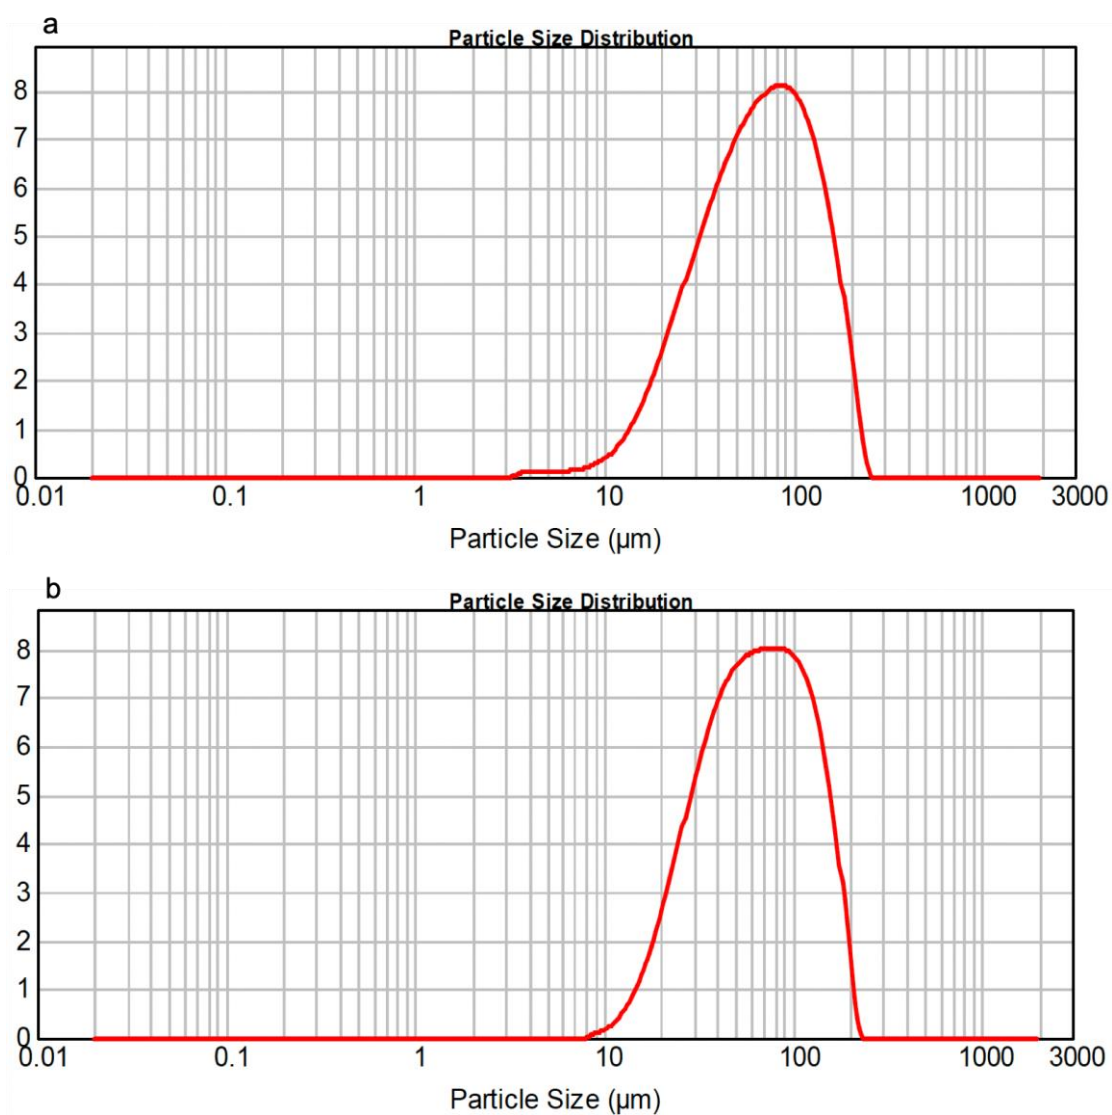

**Figure S2. Particle size distribution of (a) pristine and (b) aged TWP determined by volume of particles.**

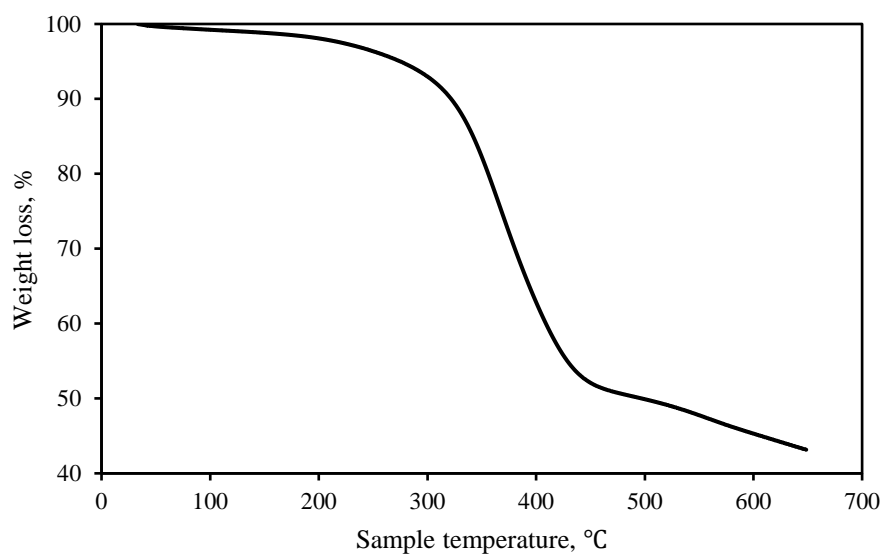

**Figure S3. Weight loss (%) of particles of the prepared TWP using thermogravimetric analysis. Volatile substances (vaporize between 30- 300°C), polymers (300- 600°C), carbon black (600- 850°C), and the residual were determined.**

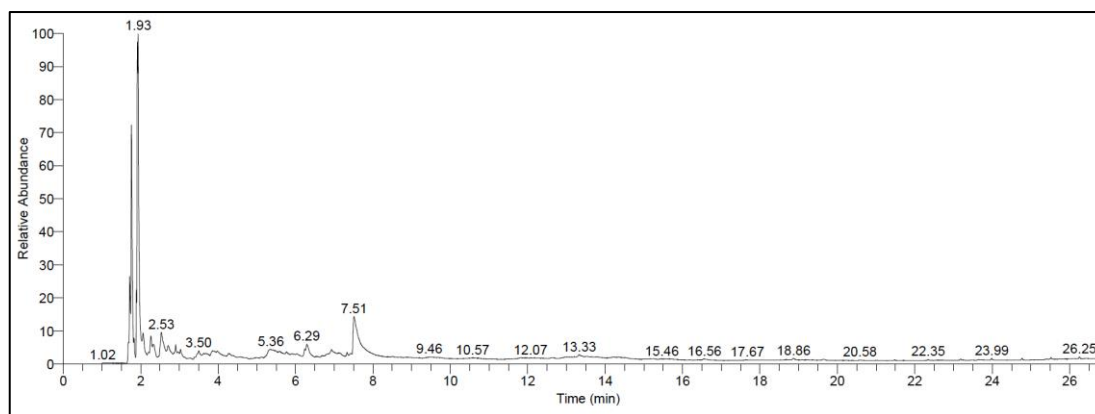

**Figure S4. Example of pyrolysis-GC/MS data obtained from the sample of particles of the prepared TWP.**

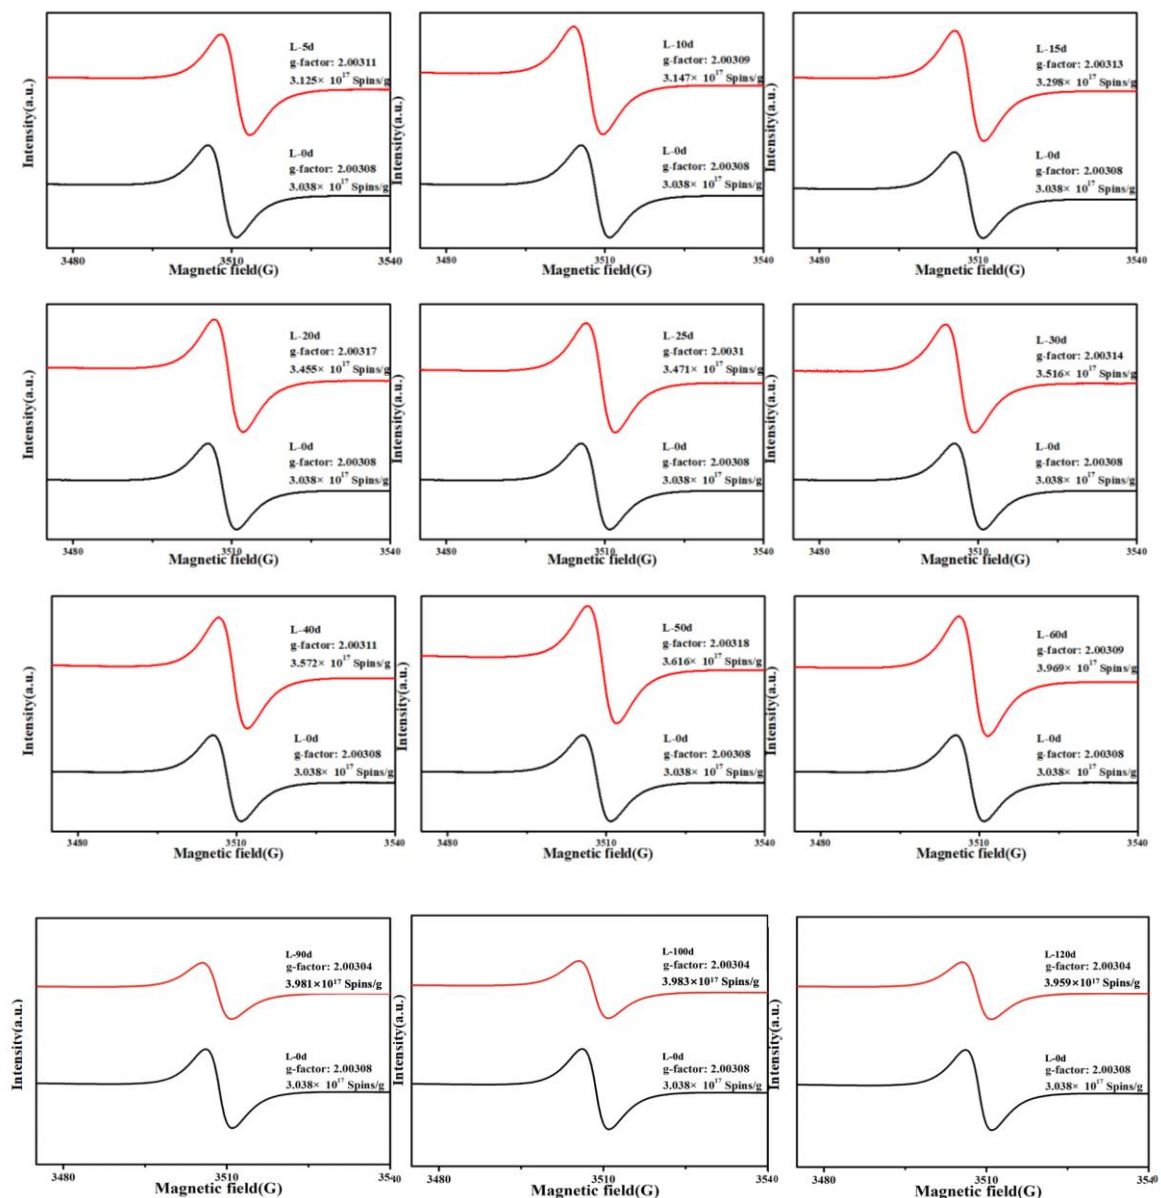

**Figure S5.** EPR spectra obtained from the EPR analysis of TWP with different light irradiation (from 0 d to 120 d, red lines). EPR analysis of TWP without light irradiation was the controls (black lines). TWP without light irradiation were regarded as the controls. The values in the figure are the g-factors and EPFRs concentrations for EPR spectra of photoaged TWP.

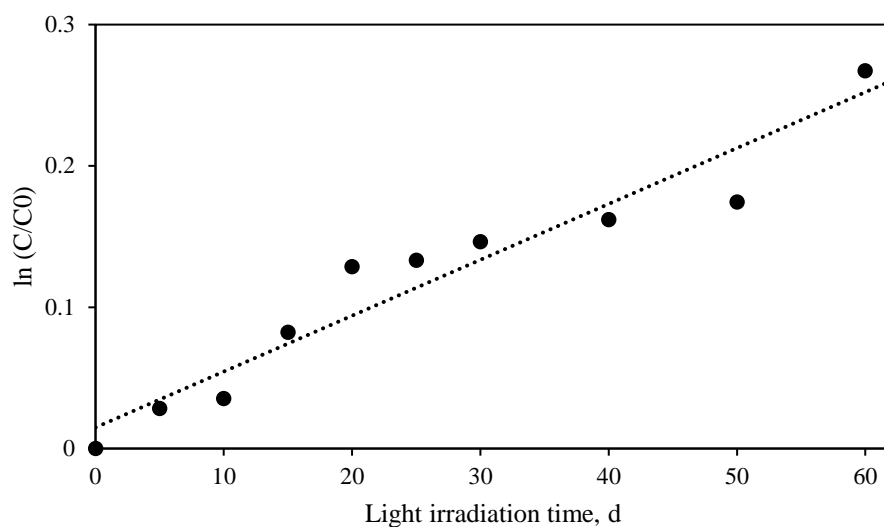

**Figure S6. Generation kinetics for EPFRs on TWP with light irradiation as function of time. Experimental results are shown by the data points, whereas the dashed lines represent the pseudo-first order kinetics, obtained by least-squares fitting ( $R^2=0.9275$ ,  $k$  value  $=0.004 \text{ d}^{-1}$ ).**

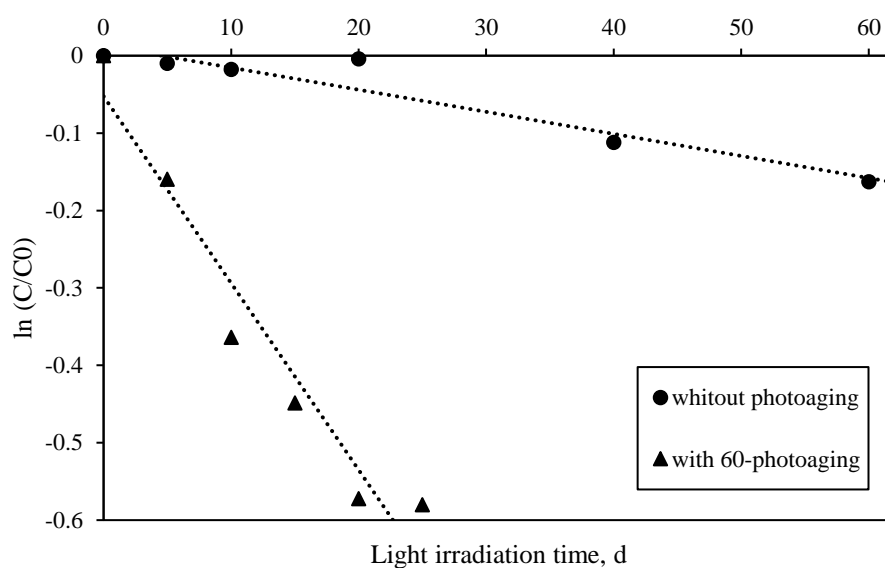

**Figure S7. Decay kinetics for EPFRs on TWP (without photoaging and with 60 d-photoaging) as function of time. Experimental results are shown by the data points, whereas the dashed lines represent the pseudo-first order kinetics, obtained by least-squares fitting (for TWP without photoaging:  $R^2=0.9404$ ,  $k$  value  $=0.0241 \text{ d}^{-1}$ ; TWP with 60 d-photoaging:  $R^2=0.9175$ ,  $k$  value  $=0.0029 \text{ d}^{-1}$ ).**

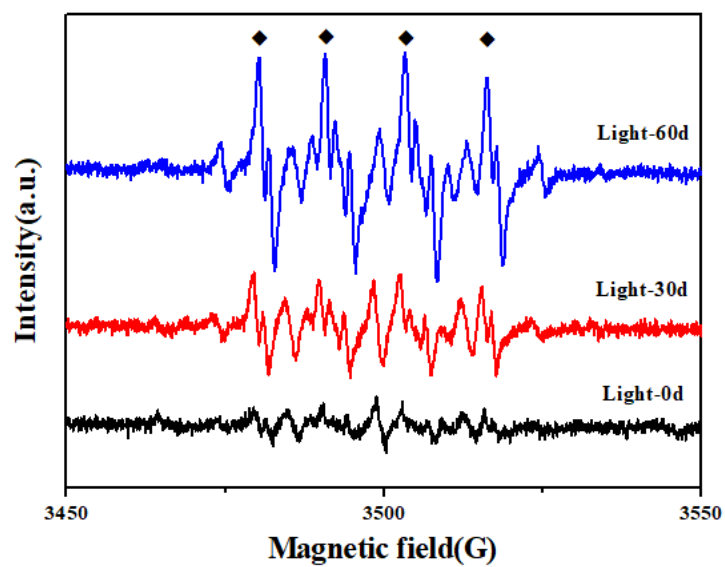

**Figure S8.** EPR spectra obtained from TWP samples with DMPO/DMSO (100 mM, 500  $\mu$ L). Black lines represent 0 d-samples, red lines represent 7 d-samples and blue lines represent 14 d-samples.

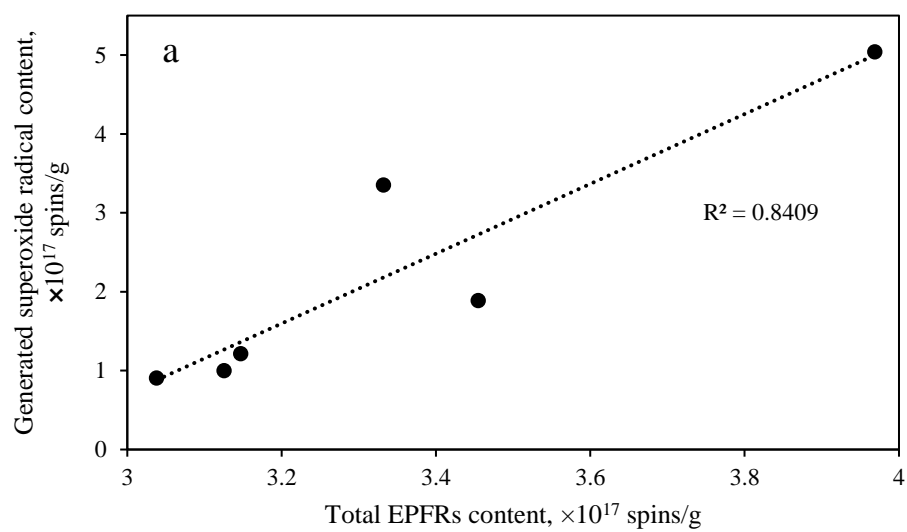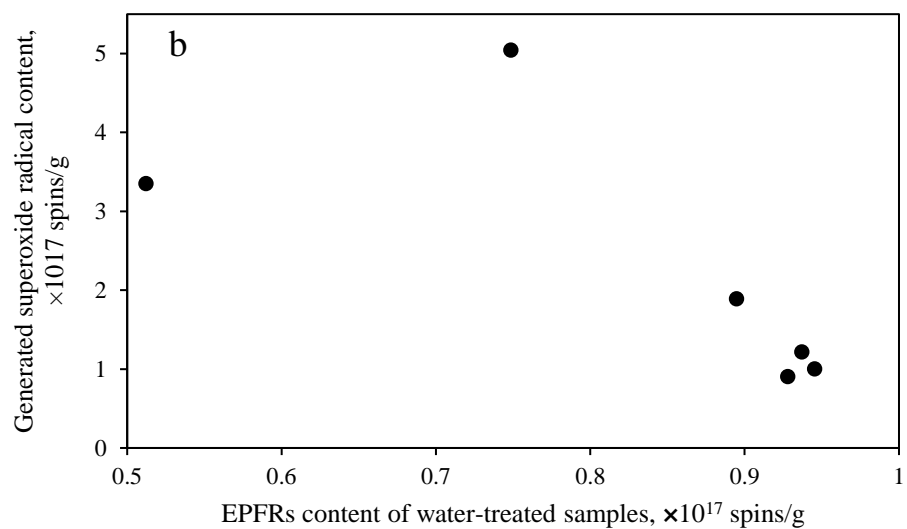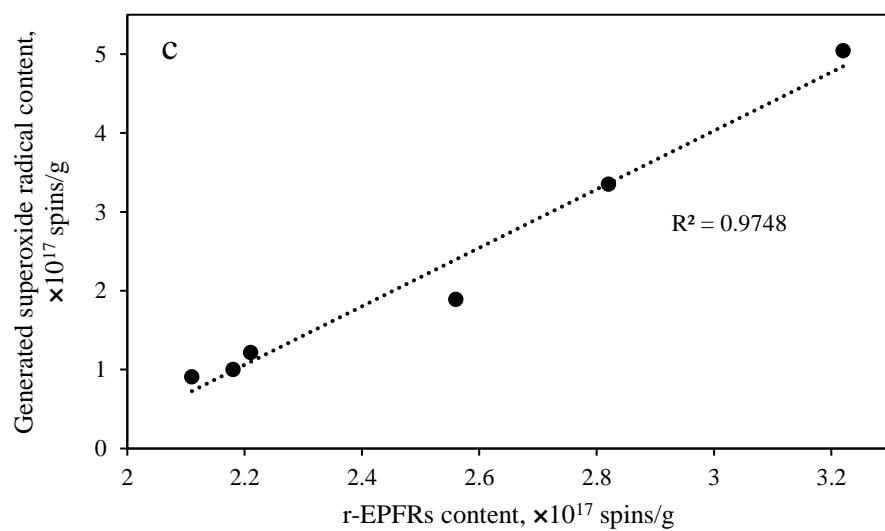

**Figure S9. Relationships between generated superoxide radicals and different free radical contents on TWP samples. Relationship between generated superoxide radicals and (a) total EPFR content of TWP samples, (b) EPFR content of TWP samples after being treated in O<sub>2</sub>-purged water, called water-treated samples, and (c) t-EPFR content of TWP samples, which is the difference of between TWP samples and water-treated TWP samples. Each data point is the mean value obtained from three independent tests, and data are shown as mean  $\pm$  SD.**

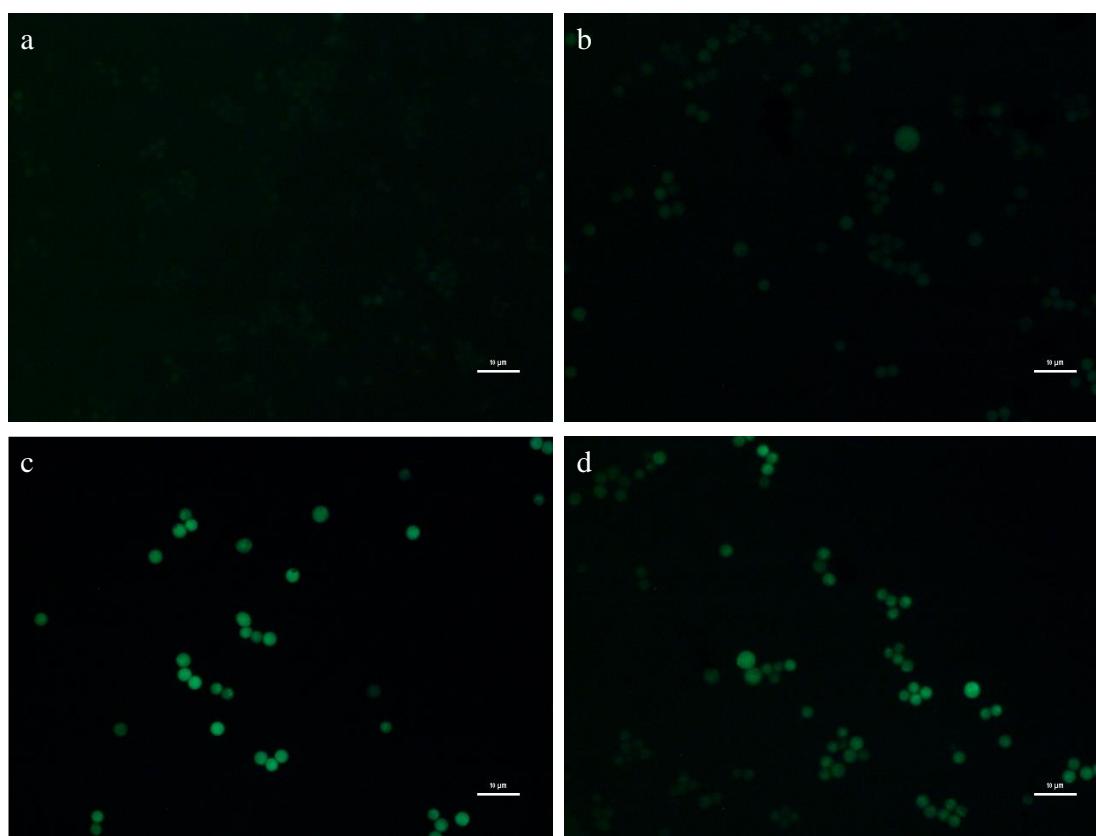

**Figure S10. Fluorescence images of macrophages in the cell culture supernatants following exposure to (b) 10 d-, (c) 30 d- and (d) 60-d photoaged TWP with adding 5 mM NAC. (a) Macrophages unexposed to TWP were regarded as the controls. The exposure time was 300 ms.**

## References

- (1) Redondo-Hasselerharm, P. E.; de Ruijter, V. N.; Mintenig, S. M.; Verschoor, A.; Koelmans, A. A. Ingestion and Chronic Effects of Car Tire Tread Particles on Freshwater Benthic Macroinvertebrates. *Environ. Sci. Technol.* **2018**, 52 (23), 13986–13994. <https://doi.org/10.1021/acs.est.8b05035>.
- (2) Zhu, K.; Jia, H.; Zhao, S.; Xia, T.; Guo, X.; Wang, T.; Zhu, L. Formation of Environmentally Persistent Free Radicals on Microplastics under Light Irradiation. *Environ. Sci. Technol.* **2019**. <https://doi.org/10.1021/acs.est.9b01474>.
